# Supplementary material
Source: HighWire-hosted journal article supplement (https://ard.bmj.com/content/76/9/1614)
Supplement: inline-supplementary-material-6 [file inline-supplementary-material-6.pdf]

Suppl Table 1: Results of multivariate association analysis for treatment effect (Maaslin pipeline)

| Phylum            | Taxa                       | Treatment associated with taxa | P.value              | Q.value              | run  |
|-------------------|----------------------------|--------------------------------|----------------------|----------------------|------|
| p__Firmicutes     | f__Mogibacteriaceae        | Biotherapy                     | 0.000359741270482697 | 0.0553132572964705   | run1 |
| p__Firmicutes     | g__Streptococcus           | PPI                            | 0.000366783096511355 | 0.0553132572964705   | run1 |
| p__Firmicutes     | f__Enterococcaceae         | Sulfasalazin                   | 1.34486738472411e-09 | 2.13139257864025e-06 | run1 |
| p__Firmicutes     | g__Enterococcus            | Sulfasalazin                   | 1.87393154770923e-06 | 0.00109507874819258  | run1 |
| p__Firmicutes     | f__Enterococcaceae; Other  | Sulfasalazin                   | 2.67016541044497e-08 | 2.49660465876605e-05 | run1 |
| p__Firmicutes     | Lactobacillales genus      | Sulfasalazin                   | 2.33173504410687e-09 | 2.72521533279991e-06 | run1 |
| p__Firmicutes     | Lactobacillus reuteri      | Sulfasalazin                   | 1.03636026371382e-06 | 0.000692140604694585 | run1 |
| p__Actinobacteria | Bifidobacteriaceae genus   | Sulfasalazin                   | 5.1164257530005e-06  | 0.00183994541502133  | run1 |
| p__Actinobacteria | g__Atopobium               | Sulfasalazin                   | 7.52826452676122e-06 | 0.00227003536446873  | run1 |
| p__Firmicutes     | f__Streptococcaceae; Other | Sulfasalazin                   | 5.1164257530005e-06  | 0.00183994541502133  | run1 |

taxa present in > 10% of the samples

taxa > 0.01% of the bacteria in the fecal samples

PPI: Proton pump inhibitor
